# Supplementary material for: Regional Multifractal Variability of the Overall Seismic Activity in Pakistan from 24 B.C to 2020 via the Application of MDFA on Earthquake Catalogs
Source: Preprints.org preprint supplement (doi:10.20944/preprints202310.1278.v1), 2023-10-19
Supplement: Supplementary file 7 [file supplementary]

## List of Suggested Reviewers

---

**1.** Martinelli, Giovanni, INGV-National Institute of Geophysics and Volcanology Dept. of Palermo, Palermo 90146, Italy  
[giovanni.martinelli15@gmail.com](mailto:giovanni.martinelli15@gmail.com)

Related Research: Geochemical features and seismic imaging of the tectonic zone between the Tibetan Plateau and Ordos Block, central northern China, *Chemical Geology*, Volume 622, 2023, <https://doi.org/10.1016/j.chemgeo.2023.121386>

**2.** Chiranjib Barman, Variable Energy Cyclotron Centre, Department of Atomic Energy, Kolkata, India  
[cbarman@vecc.gov.in](mailto:cbarman@vecc.gov.in)

Related Research: Sahoo SK, Katlamudi M, Barman C, Lakshmi GU. Identification of earthquake precursors in soil radon-222 data of Kutch, Gujarat, India using empirical mode decomposition based Hilbert Huang Transform. *J Environ Radioact.* 2020. <https://doi.org/10.1016/j.jenvrad.2020.106353>

**3.** El-Nabulsi, Rami-Ahmad, Research Center for Quantum Technology, Faculty of Science, Chiang Mai University, Chiang Mai, 50200, Thailand.  
[el-nabulsi@atiner.gr](mailto:el-nabulsi@atiner.gr)

Related Research: Fractal dimension modeling of seismology and earthquakes dynamics. <https://doi.org/10.1007/s00707-022-03213-7>

**4.** Smirnova, Natalia, Institute of Physics, St Petersburg University.  
[nsmir@geo.phys.spbu.ru](mailto:nsmir@geo.phys.spbu.ru)

Related Research: Varlamov, A., Smirnova, N., Hayakawa, M. *et al.* Fractal characteristics of the ULF emissions along a meridian profile, based on the 210 MM stations data. *Acta Geophys.* 60, 928–941 (2012). <https://doi.org/10.2478/s11600-012-0035-7>

**5.** Mokhtari Mohammad, International Institute of Earthquake Engineering and Seismology (IIEES), Tehran, Iran,  
[mokhtari@iiees.ac.ir](mailto:mokhtari@iiees.ac.ir)

Related Research: The distinct morphologic signature of underplating and seamounts in accretionary prisms, insights from thermomechanical modeling applied to Coastal Iranian Makran, *Tectonophysics*, Volume 845, 2022 <https://doi.org/10.1016/j.tecto.2022.229617>

**6.** Kawabata, Kuniyo, Admission Center, Institute for Comprehensive Education, Kagoshima University, 1-21-24 Korimoto, Kagoshima 890-8580, Japan  
[kuniyok@km.kagoshima-u.ac.jp](mailto:kuniyok@km.kagoshima-u.ac.jp)

Related Research: Changes in groundwater radon concentrations caused by the 2016 Kumamoto earthquake. J Hydrol (Amst). 2020. Vol. 584:124712. <https://doi.org/10.1016/j.jhydrol.2020.124712>

**7.** Onischenko, Andriy, Physics Department, Faculty of Automatics and Computerized Technologies, Kharkiv National University of Radioelectronics, Kharkiv, Ukraine,  
[andrey.onishchenko@nure.ua](mailto:andrey.onishchenko@nure.ua)

Related Research: FRACTAL AND MULTI-FRACTAL ANALYSES OF THE GEOMAGNETIC FIELD VARIATIONS CAUSED BY THE EARTHQUAKE ON JANUARY 24, 2020 IN TURKEY. <https://journalofnastech.com/index.php/pub/article/view/7/7>

**8.** Pradhan Biswajeet, Centre for Advanced Modelling and Geospatial Information System, School of Information, Systems and Modelling, Faculty of Engineering and Information Technology, University of Technology Sydney, NSW 2007, Ultimo, Australia  
[biswajeet24@gmail.com](mailto:biswajeet24@gmail.com)

Related Research: Estimation of fractal dimension and  $b$ -value of earthquakes in the Himalayan region. <https://doi.org/10.1007/s12517-021-07271-4>
