# Supplementary material for: Regional Multifractal Variability of the Overall Seismic Activity in Pakistan from 24 B.C to 2020 via the Application of MDFA on Earthquake Catalogs
Source: Preprints.org preprint supplement (doi:10.20944/preprints202310.1278.v1), 2023-10-19
Supplement: Supplementary file 8 [file supplementary]

# **Regional Multifractal Variability of the Overall Seismic Activity in Pakistan from 24 B.C to 2020 via the Application of MDFA on Earthquake Catalogs**

by

Aftab Alam<sup>a</sup>,  
Dimitrios Nikolopoulos<sup>b</sup>,  
Demetrios Cantzos<sup>b</sup>,  
Muhammad Tahir<sup>a</sup>,  
Tahir Iqbal<sup>a</sup>,  
Ermioni Petraki<sup>b</sup>,  
Panayiotis Yannakopoulos<sup>c</sup>  
and  
Muhammad Rafique<sup>d</sup>,

<sup>a</sup>**Centre for Earthquake Studies, National Centre for Physics, Shahdra Valley Road, P.O. Box No. 2141, Islamabad 44000, Pakistan**  
aftab.alam@ncp.edu.pk (A.A.)

<sup>b</sup>**University of West Attica Department of Industrial Design and Production Engineering, Petrou Ralli & Thivon 250, Aigaleo, GR-12244, Athens, Greece;**  
dniko@uniwa.gr (D.N.)  
ermionipetraki@gmail.com (E.P.)  
cantzos@uniwa.gr

<sup>c</sup>**Department of Informatics and Computer Engineering, University of West Attica, Agiou Spyridonos, GR-12243 Aigaleo, Greece**  
pyannakopoulos@yahoo.co.uk (P.Y.)

<sup>d</sup>**Department of Physics University of Azad Jammu and Kashmir Muzaffarabad, King Abdullah Campus 13100, Azad Kashmir, Pakistan**  
mrafique@ajku.edu.pk (M.R.)

\* Correspondence: Dimitrios Nikolopoulos, *University of West Attica Department of Industrial Design and Production Engineering*.
